# Supplementary material for: Abnormal Cholesterol Metabolism and Lysosomal Dysfunction Induce Age-Related Hearing Loss by Inhibiting mTORC1-TFEB-Dependent Autophagy
Source: MDPI journal article supplement (doi:10.3390/ijms242417513), 2023-12-15
Supplement: s1 [file s1]

**Table S1.** Real-time PCR primer list

| Target gene       | Primer sequences               |
|-------------------|--------------------------------|
| <i>Tfeb-F</i>     | CAG CAG GTG GTG AAG CAA GAG T  |
| <i>Tfeb-R</i>     | TCC AGG TGA TGG AAC GGA GAC T  |
| <i>Map1lc3b-F</i> | TTC TTC CTC CTG GTG AAT GG     |
| <i>Map1lc3b-R</i> | GTG GGT GCC TAC GTT CTC AT     |
| <i>Vps18-F</i>    | TTG TCG TCT CCA GCA ATC AG     |
| <i>Vps18-R</i>    | CCT TGC CCA AGT CAA TGC        |
| <i>Gpnmb-F</i>    | AGA AAT GGA GCT TTG TCT ACG TC |
| <i>Gpnmb-R</i>    | CTT CGA GAT GGG AAT GTA TGC C  |
| <i>Mcoln1-F</i>   | CTG ATG CTG CAA GTG GTC AA     |
| <i>Mcoln1-R</i>   | GGT GTT CTC TTC CCG GAA TGT C  |
| <i>Pparg-F</i>    | GTG ATG GAA GAC CAC TCG CAT T  |
| <i>Pparg-R</i>    | CCA TGA GGG AGT TAG AAG GTT C  |
| <i>Atp5d-F</i>    | CAT GTC CCC ACA CTA CAG GTC    |
| <i>Atp5d-R</i>    | TCG GCA TTC ACA GTG ACG        |
| <i>Hmgcs1-F</i>   | TGA TCC CCT TTG GTG GCT GA     |
| <i>Hmgcs1-R</i>   | AGG GCA ACG ATT CCC ACA TC     |
| <i>Hmgcr-F</i>    | ATC CTG ACG ATA ACG CGG TG     |
| <i>Hmgcr-R</i>    | AAG AGG CCA GCA ATA CCC AG     |
| <i>Mvd-F</i>      | CTG CAC CAG GAC CAG CTA AA     |
| <i>Mvd-R</i>      | CTG AGG CTG AGG GGT AGA G      |
| <i>Cyp51-F</i>    | GTT TCA GGC GCA GGG ATA GA     |
| <i>Cyp51-R</i>    | CAT CTG TTA GAG GAC GCC CG     |

|                   |                                   |
|-------------------|-----------------------------------|
| <i>Nd1-F</i>      | CCC ATT CGC GTT ATT CTT           |
| <i>Nd1-R</i>      | AAG TTG ATC GTA ACG GAA GC        |
| <i>Sdhb-F</i>     | TGG TGG AAC GGA GAC AAG TA        |
| <i>Sdhb-R</i>     | TGG CAG CGG TAG ACA GAG AA        |
| <i>Uqcrc1-F</i>   | GGG GCA AAA ACA TCC TTA GG        |
| <i>Uqcrc1-R</i>   | ATC CGG CTC TCC CAC TCA GC        |
| <i>Cox5b-F</i>    | CGT CCA TCA GCA ACA AGA GA        |
| <i>Cox5b-R</i>    | AGA TAA CAC AGG GGC TCA GT        |
| <i>Atp6-F</i>     | TCC CAA TCG TTG TAG CCA TCA       |
| <i>Atp6-R</i>     | AGA CGG TTG TTG ATT AGG CG        |
| <i>Npc1-F</i>     | TGA GGT CAC GGG GCC ATG TA        |
| <i>Npc1-R</i>     | GGC ATC CAA GCC CCA GAT CC        |
| <i>Npc2-F</i>     | TAT CTT GTG ACT GCT CGG           |
| <i>Npc2-R</i>     | CTG GTA AAG GTG ATG TTG A         |
| <i>Srebp-1-F</i>  | AAG CAA ATC ACT GAA GGA CCT GG    |
| <i>Srebp-1-R</i>  | AAA GAC AAG GGG CTA CTC TGG GAG   |
| <i>Srebp-1c-F</i> | CTT CTG GAG ACA TCG CAA AC        |
| <i>Srebp-1c-R</i> | GGT AGA CAA CAG CCG CAT C         |
| <i>Srebp2-F</i>   | GCG TTC TGG AGA CCA TGG A         |
| <i>Srebp2-R</i>   | ACA AAG TTG CTC TGA AAA CAA ATC A |
| <i>Fasn-F</i>     | CAG CAG AGT CTA CAG CTA CCT       |
| <i>Fasn-R</i>     | ACC ACC AGA GAC CGT TAT GC        |
| <i>Scd1-F</i>     | AGA GAG AGA GGT AGC CAT ATC       |
| <i>Scd1-R</i>     | TCA AAT CTC ACT AAT CTC TGG       |

*18S rRNA -F*

GTA ACC CGT TGA ACC CCA TT

*18S rRNA -R*

CCA TCC AAT CGG TAG TAG CG

---

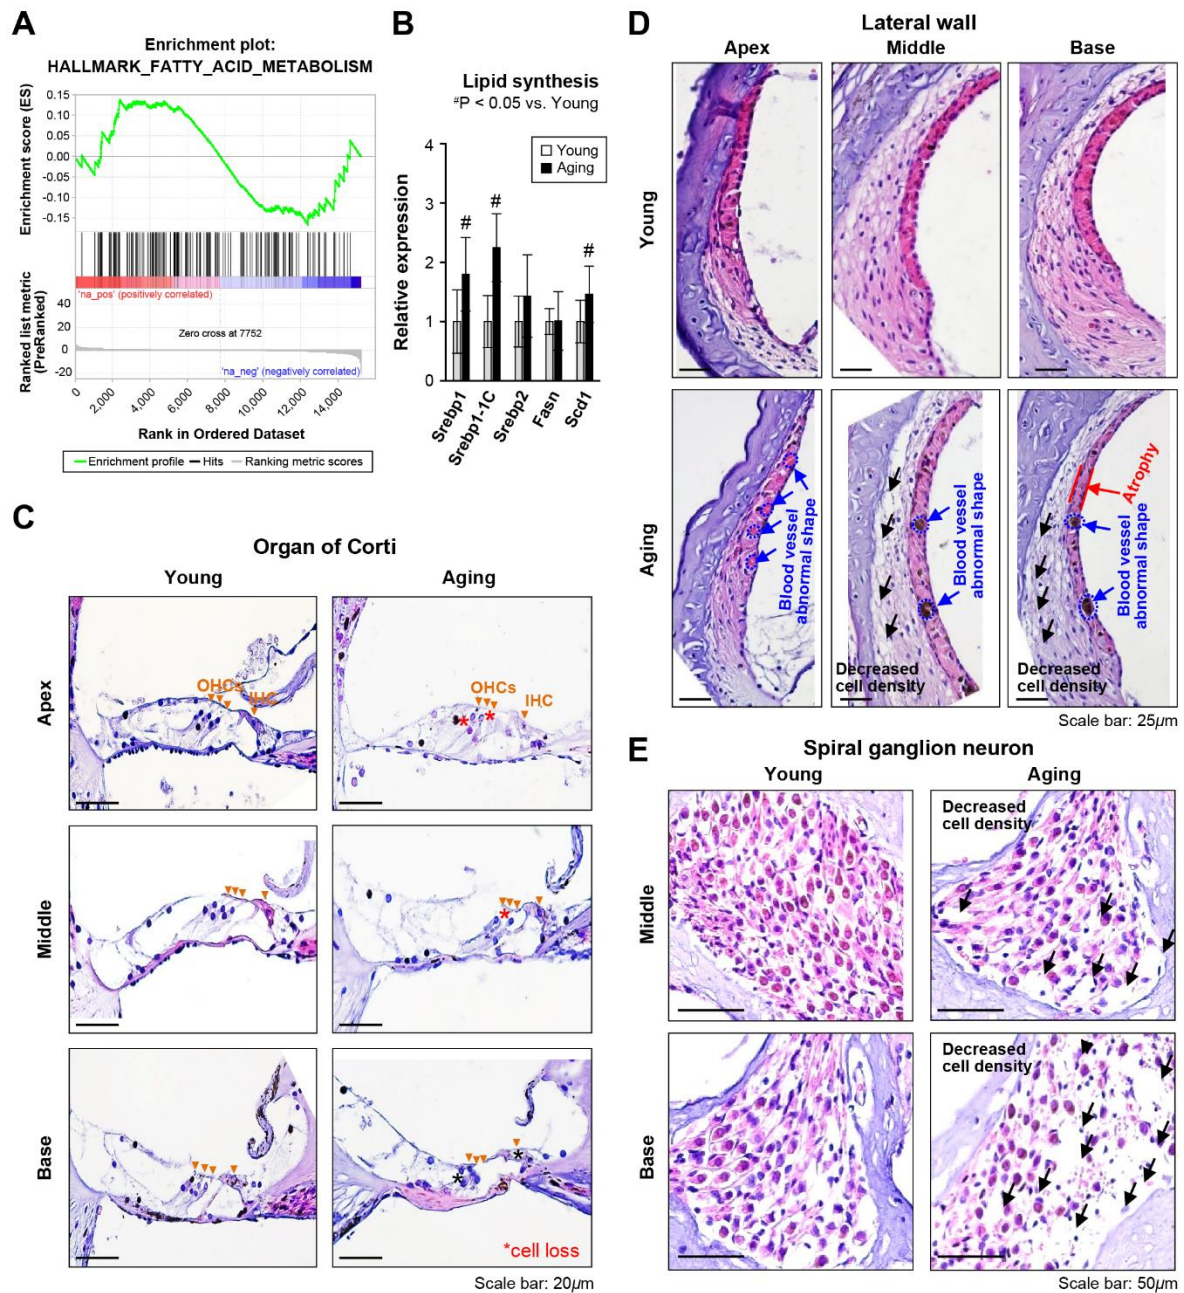

**Figure S1.** Histological analysis of the organ of Corti, stria vascularis at the lateral wall, and spiral ganglion neurons of the cochlear tissue. **(A)** Gene set enrichment assay (GSEA) showed that genes whose expression was positively correlated with fatty acid metabolism were upregulated in the age-related hearing loss (ARHL), as compared to the young group. **(B)** qPCR analysis of lipid synthesis-related genes. Means  $\pm$  standard deviation (SD). **(C)** Hematoxylin and eosin (H&E)-stained sections from the cochlear apex to the basal turn. Arrowheads indicate

inner hair cells (IHCs) and outer hair cells (OHCs). Asterisks indicate cell loss. **(D)** Abnormal blood vessel shapes, **(C–E)** decreased cell density, and **(C)** striavascularis atrophy are indicated by blue, black, and red arrows, respectively. Experiments were performed in at least duplicate  $\#p < 0.05$  (Student's *t*-test).

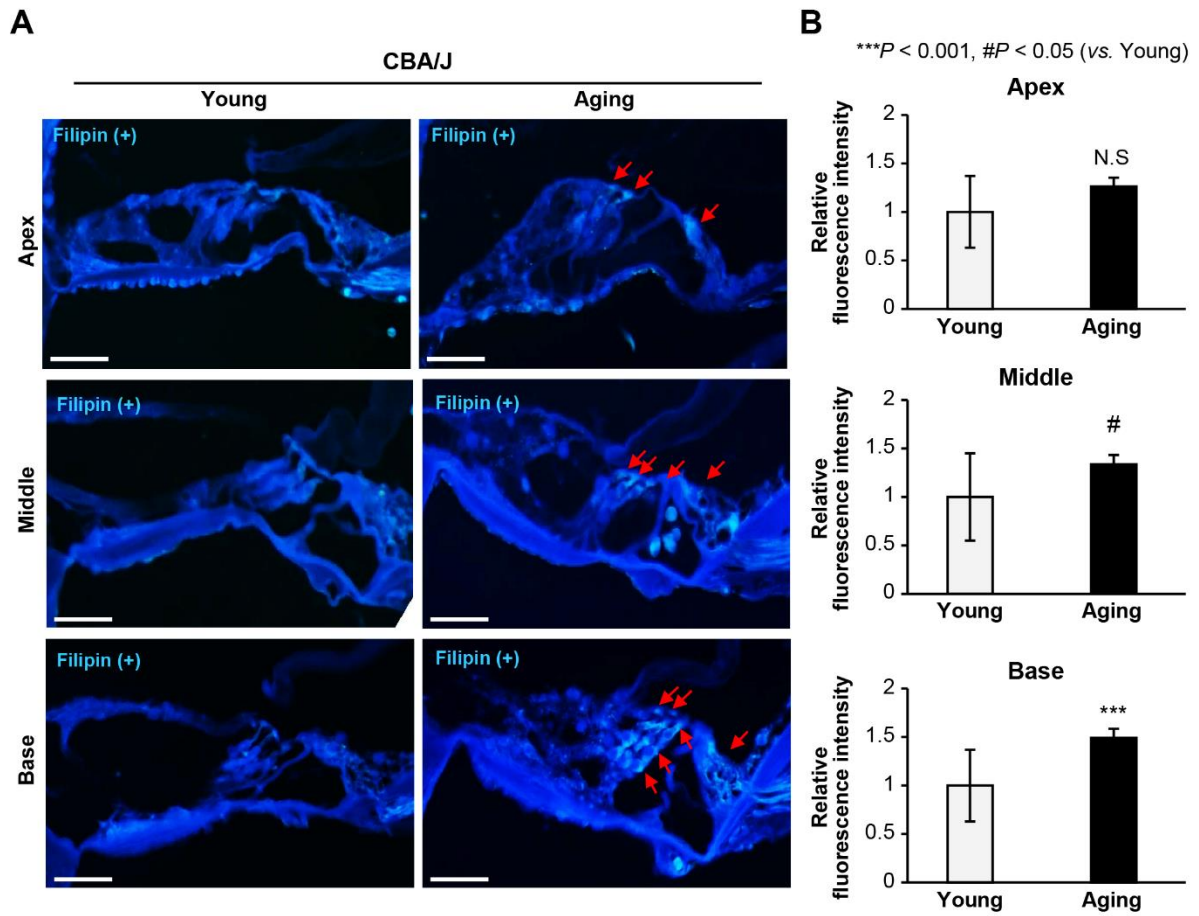

**Figure S2.** ARHL cochleae have an increased cholesterol level in the organ of Corti. **(A)** Filipin staining from the cochlear apex to the basal in young and aging mice. Arrows indicate filipin-positive IHCs, OHCs, and supporting cells (SCs). Scale bars, 20  $\mu$ m. **(B)** Filipin fluorescence intensity in young ( $n = 4$ ) and aging ( $n = 4$ ) tissue sections. Means  $\pm$  standard error of the mean (SEM). # $p < 0.05$ , \*\*\* $p < 0.001$  by Student's  $t$ -test.

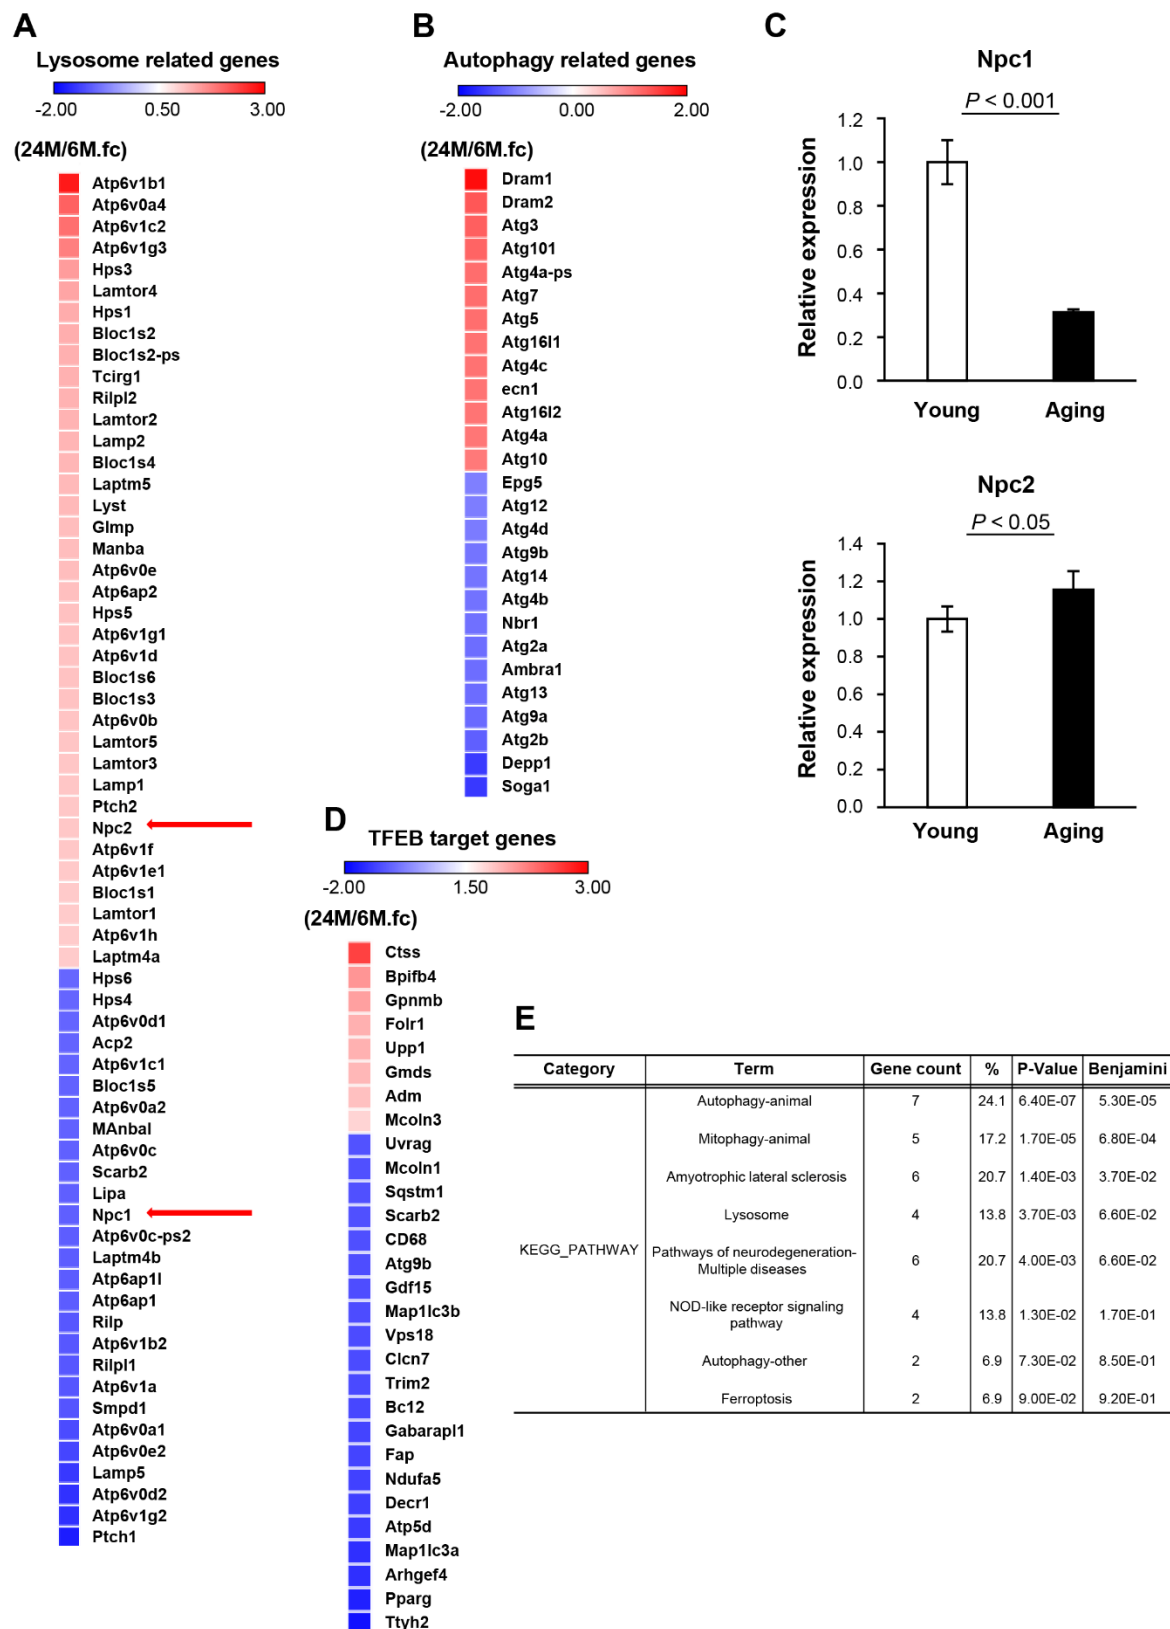

**Figure S3.** Heat map of transcription factor EB (TFEB) and differentially expressed genes

(DEGs) related to the lysosome and autophagy. **(A and B)** Autophagy and lysosome-related heatmap results analyzed through functional annotations of lysosomes, including Niemann–Pick C1 (NPC1) and 2 (indicated by red arrows), as well as autophagy from DEG raw data. **(C)** Validation of *Npc1* and *Npc2* by qPCR in the ARHL, as compared to the young group. Means  $\pm$  SD. **(D)** TFEB target gene heat map result was analyzed from DEG raw data according to published articles [1-3]. For KEGG pathway enrichment analysis, we used the web-based DAVID tool (<https://David.ncifcrf.gov/home.jsp>). **(E)** KEGG pathway enrichment analysis of DEGs with autophagy, the lysosome, and autophagy-related diseases. Experiments were performed at least three times for each condition and repeated at least twice  $p < 0.05$ ,  $p < 0.001$  (Student's *t*-test). DEG raw data are presented in the supplemental source file. Heat map was prepared using MORPHEUS online software (<https://software.broadinstitute.org/morpheus/>).



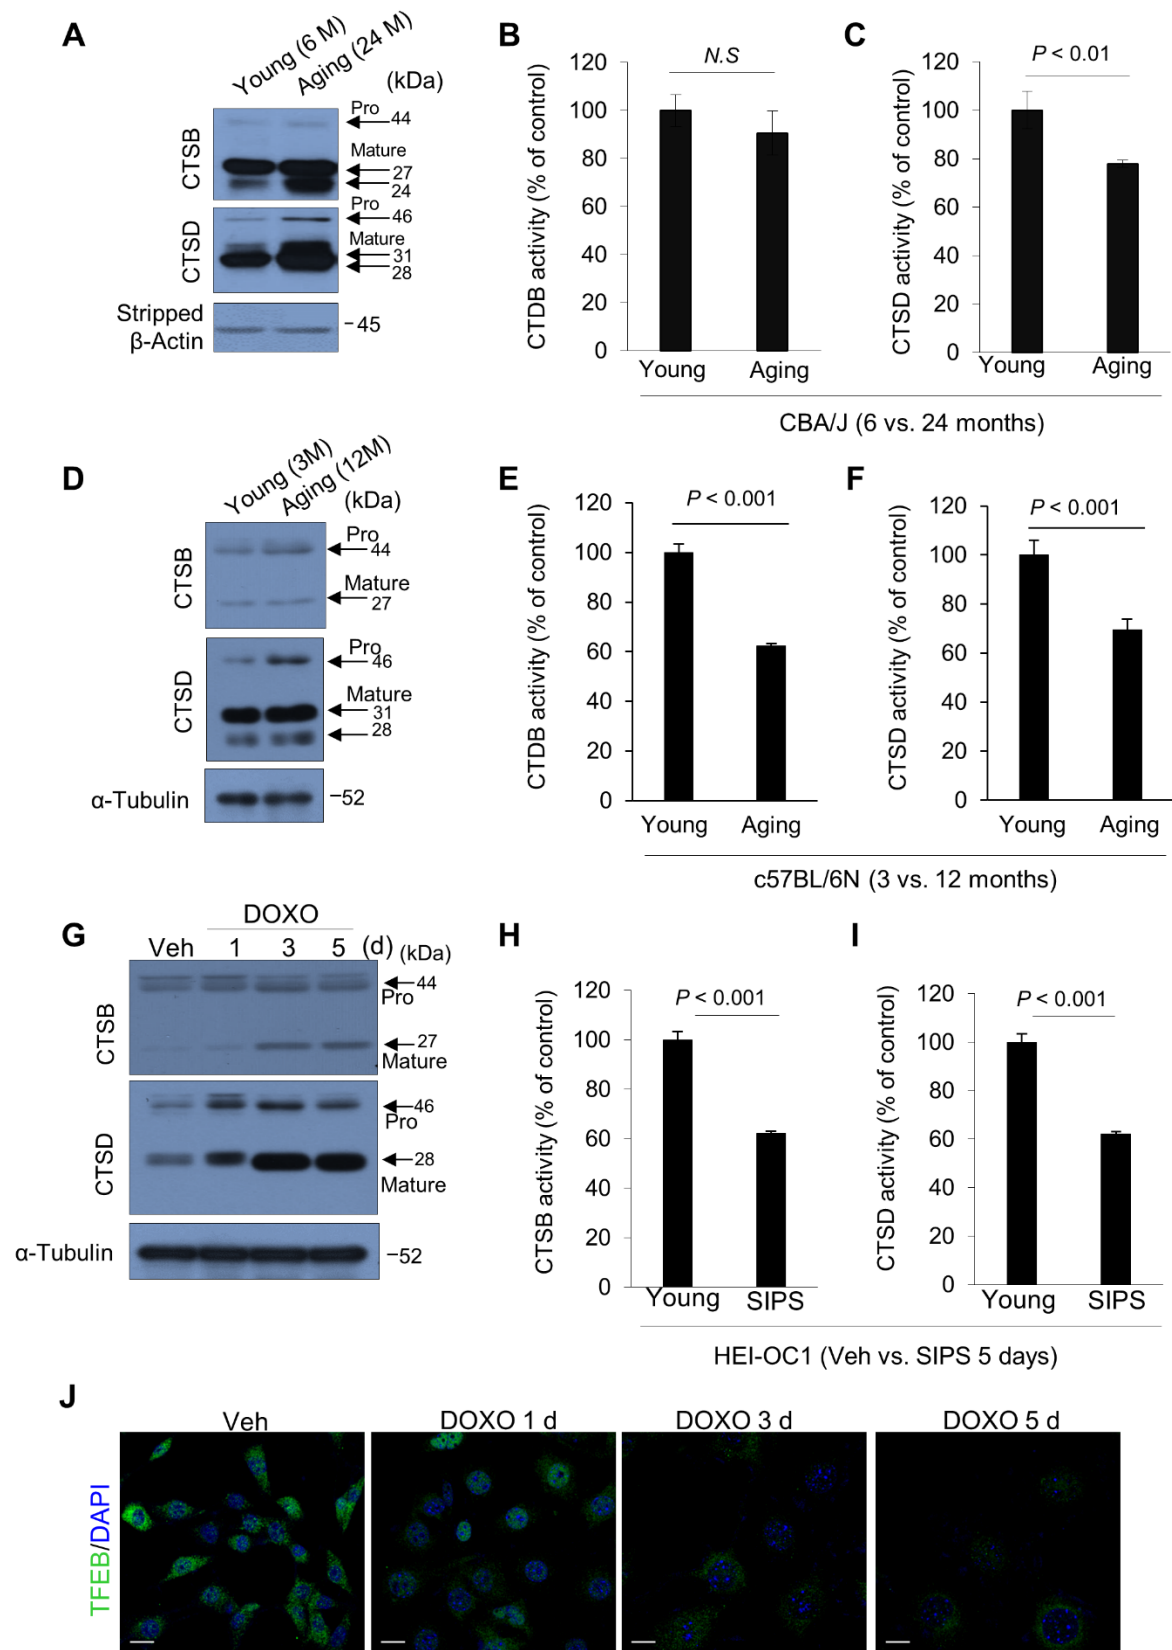

**Figure S4.** Cathepsin B, D (CTSB, D) expression and activities in two mouse models and

models of SIPS. (**A, D and G**) CTSB, CTSD protein expression and (**B, C, E, F, H and I**) CTSB, CTSD activities were measured in whole cochlea or cell extract by immunoblotting and using an enzyme activity assay kit.  $\beta$ -Actin or  $\alpha$ -tubulin were used as the loading control for immunoblotting. Means  $\pm$  SD. (**J**) TFEB expression and nuclear localization by immunocytochemistry with or without doxorubicin (DOXO; 100 ng/mL). Nuclei were stained with 4',6-diamidino-2-phenylindole (DAPI). Scale bars, 20  $\mu$ m. Experiments were performed at least three times for each condition and repeated at least twice;  $p < 0.01$ ,  $p < 0.001$  (Student's *t*-test).

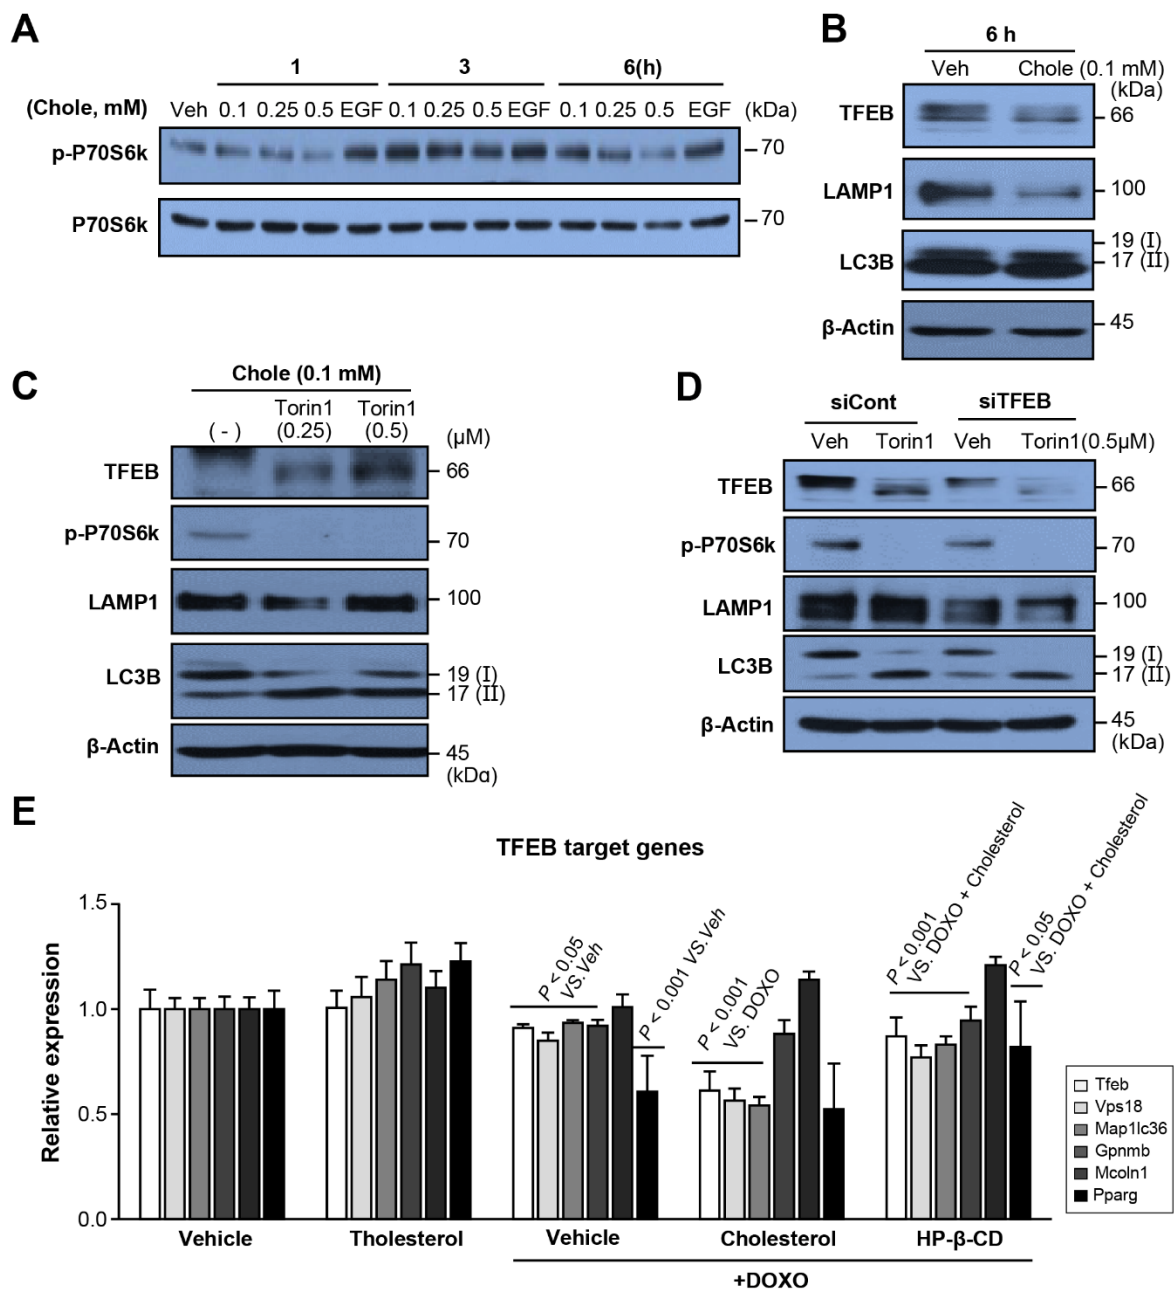

**Figure S5.** Cholesterol negatively regulates TFEB expression by increasing mammalian target of rapamycin complex 1 (mTORC1) activity. (A) House Ear Institute organ of Corti 1 (HEI-OC1) cells were treated with cholesterol (0.1, 0.25, and 0.5 mM) for 1, 3 and 6 h. mTORC1 activity was assayed by measuring phosphorylation of p70S6K. p70S6K was used as the loading control. Epidermal growth factor (EGF; 10 ng/mL) was used as the positive control. Cells were treated with cholesterol (0.1 mM) for 30 min, and Torin1 (0.5 μM) for 6 h. (B)

TFEB, LAMP-1, and LB3B protein levels were downregulated by cholesterol at 6 h; the effect was reversed (C) by an mTORC1 inhibitor (Torin 1).  $\beta$ -Actin was used as the loading control. (D) To analyze whether autophagy- and lysosome-related protein expressions are regulated by TFEB protein, cells were transfected with siControl or siTFEB. After 24 h, the cells were treated with or without Torin1 (0.5  $\mu$ M) for 48 h. (E) To analyze TFEB target gene expression under high or low cholesterol conditions in the presence of DOXO (100 ng/mL) for 24 h, the cells were treated with cholesterol (0.1 mM) or 2-hydroxypropyl- $\beta$ -cyclodextrin (HP- $\beta$ -CD; 5 mM) for 3 days. (D) qPCR analysis of TFEB target genes under identical conditions. *18S ribosomal RNA* was used as the control. Means  $\pm$  SD. Experiments were performed at least three times for each condition and repeated at least twice.  $p < 0.05$ ,  $p < 0.001$  (one-way analysis of variance [ANOVA] followed by Tukey's honestly significant difference [HSD] test).

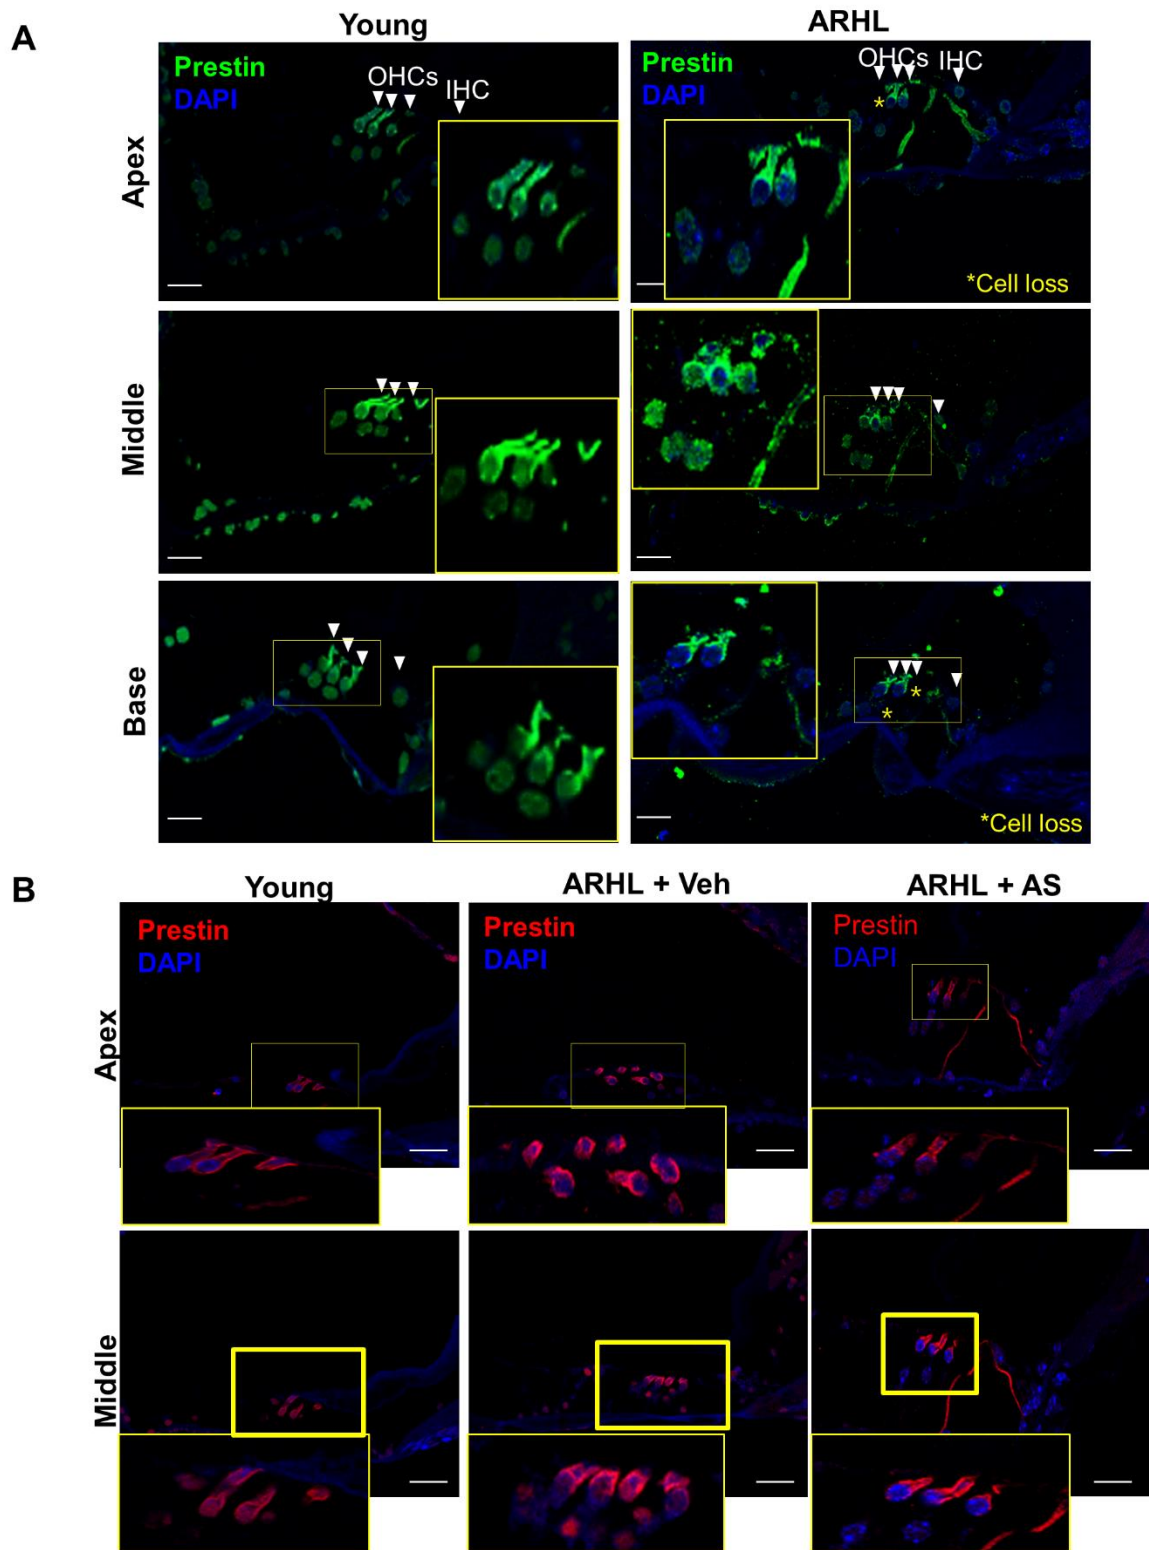

**Figure S6.** AS prevents alteration of OHC formation and prestin membrane aggregation in ARHL cochlea. (**A and B**) Cochlear sections from young and ARHL mice, treated or not with AS (1.2 mg/kg), were immunolabeled with anti-prestin antibody to evaluate prestin

rearrangement in the organ of Corti (yellow box). DAPI was used as the counterstain. Scale bars, 20  $\mu\text{m}$ . White arrowhead: OHC and IHC. \*: Loss of cell.

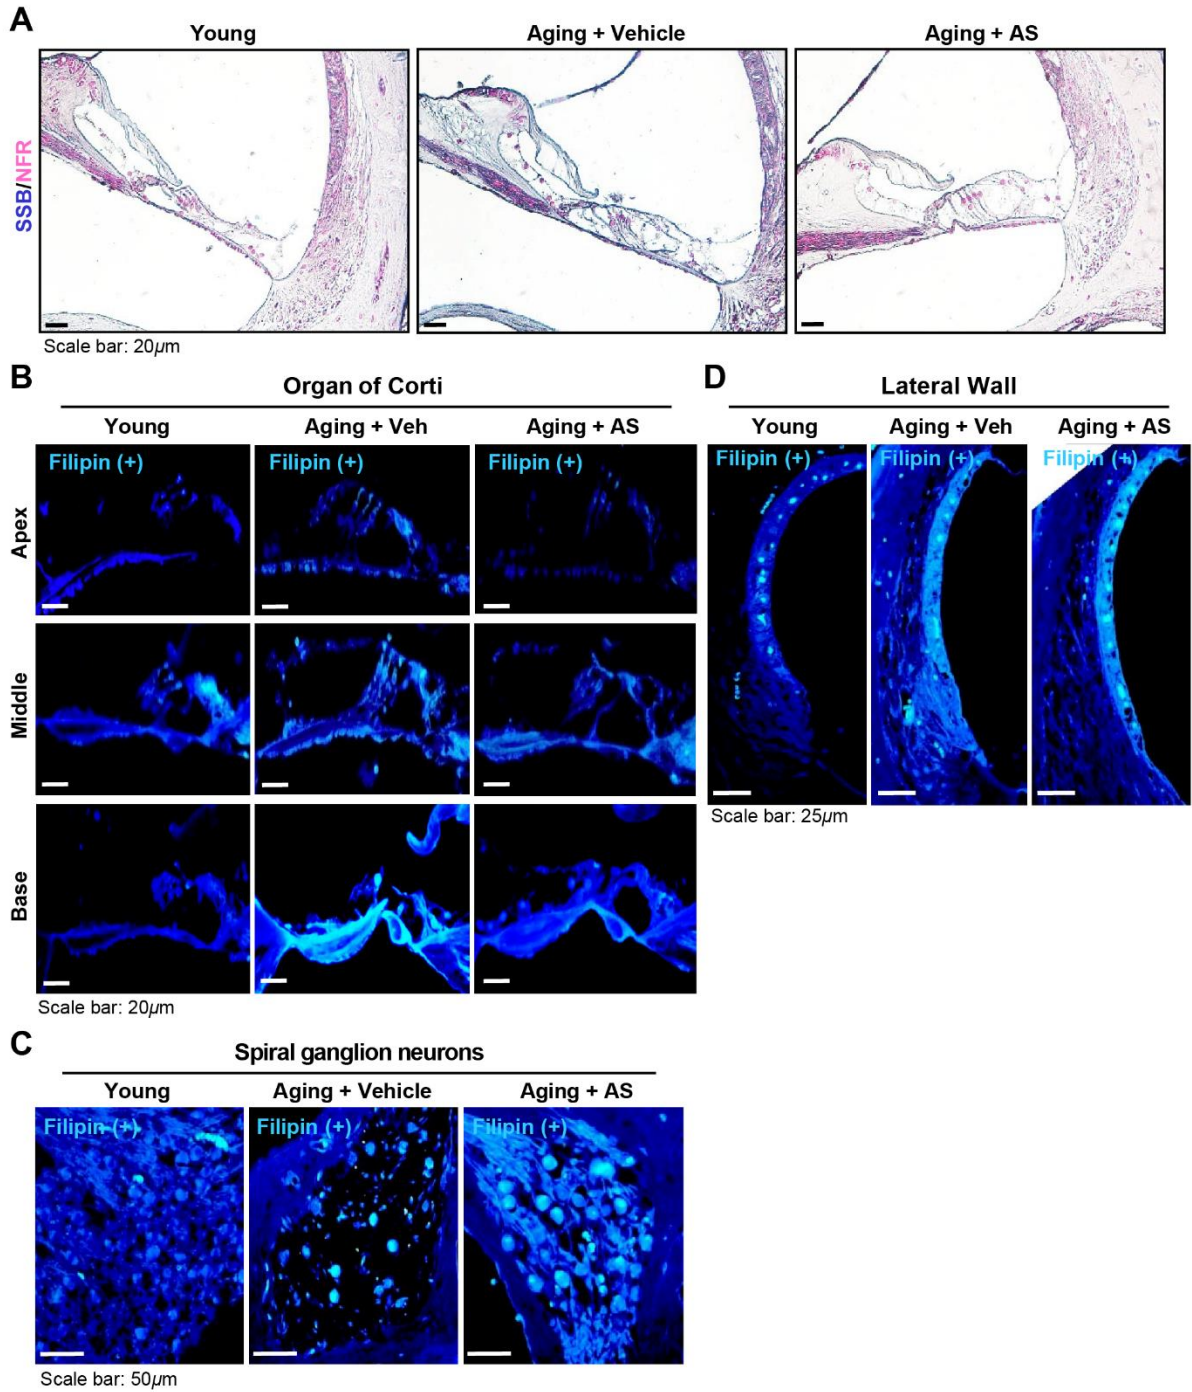

**Figure S7.** AS decreases lipofuscin and cholesterol levels in ARHL, as compared to young mice. **(A)** Sudan Black B (SBB) staining with Nuclear Fast Red (NFR) counterstaining in cochlear sections from young and ARHL mice treated or not with AS. **(B)** Filipin staining from the apex to the basal turn of the organ of Corti, **(C)** spiral ganglion neurons, and **(D)** lateral walls in young and aging mice.



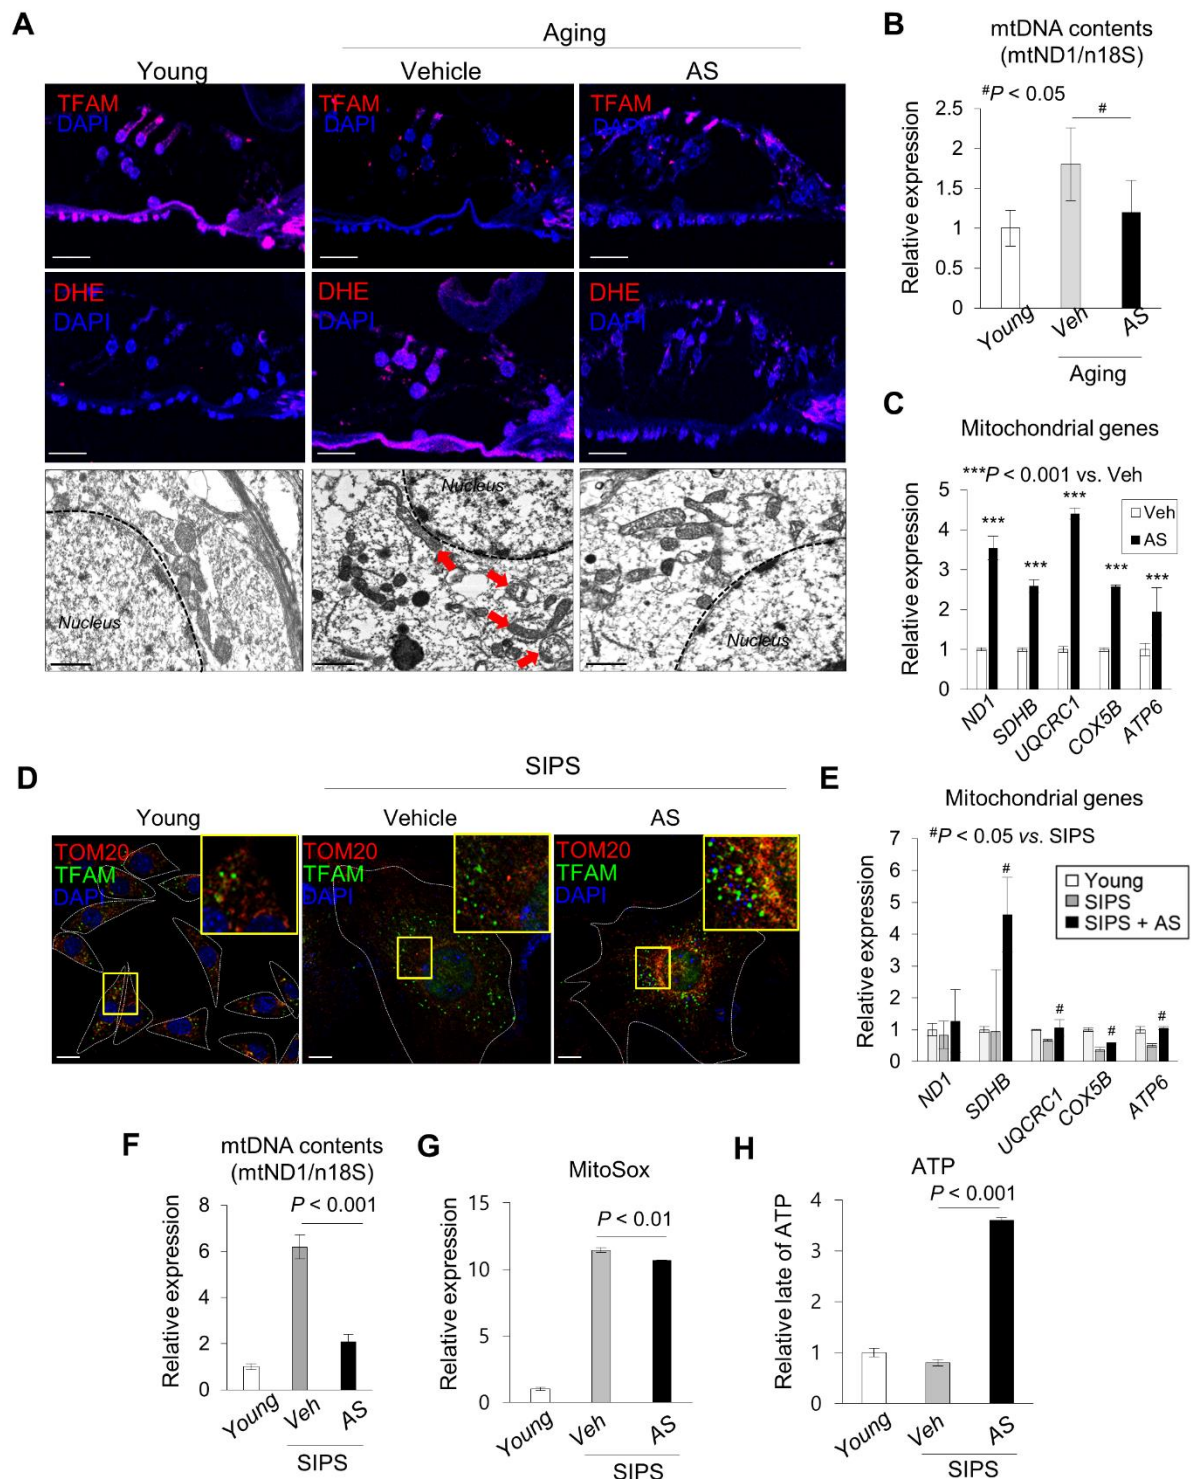

**Figure S8.** Atorvastatin (AS) balancing intracellular reactive oxygen species (ROS) and adenosine triphosphate (ATP) production by regulation of antioxidants and mitochondria biogenesis depend on TFEB expression. (A) Cochlear sections from vehicle- or AS-treated young and ARHL mice were immunolabeled with an anti-TFAM antibody to evaluate



mitochondrial biogenesis. The fluorescent probe, dihydroethidium (DHE; 10  $\mu$ M), was used to detect ROS. DAPI was used as the counterstain. Scale bars, 20  $\mu$ m. Abnormal mitochondria and lipofuscin aggregates observed by transmission electron micrograph (TEM) in the cochlea of vehicle or AS-treated young and ARHL mice. Red arrow indicates cristae loss and alteration of mitochondria shape. Scale bar, 1  $\mu$ m. **(B)** Total DNA was isolated from whole cochlea extract, and mtDNA was quantified by qPCR as the ratio of mtDNA (NADH-ubiquinone oxidoreductase subunit 1; ND1) to nDNA. **(C)** qPCR of mitochondrial OXOPHOS complex genes. 18S ribosomal RNA was used as the control. Means  $\pm$  SD. **(D)** HEI-OC1 cells were treated with DOXO (100 ng/mL) for 24 h and treated with vehicle or AS (0.5  $\mu$ M) for 3 days. TOM20 (ab56783) and TFAM protein levels were evaluated by immunocytochemistry. Scale bars, 20  $\mu$ m. DAPI was used as the counterstain. White dotted lines show cell bodies. Yellow boxes show mitochondrial biogenesis. **(E)** qPCR of mitochondrial OXOPHOS complex genes. 18S ribosomal RNA was used as the control. Means  $\pm$  SD. **(F)** mtDNA content quantified by qPCR. **(G)** Dysfunctional mitochondrial ROS generation detected by MitoSOX (5  $\mu$ M) staining and flow cytometry. **(H)** Total ATP content was measured using an ATP Determination Kit. Experiments were performed at least three times for each condition and repeated at least twice.  $p < 0.05$ ,  $p < 0.01$ ,  $p < 0.001$  (Student's *t*-test or one-way ANOVA followed by Tukey's HSD test).

## Supplemental References

1. Carey KL, Paulus GLC, Wang L, et al. TFEB transcriptional responses reveal negative feedback by BHLHE40 and BHLHE41. *Cell Rep.* 2020 Nov 10;33(6):108371. PubMed PMID: 33176151.
2. Martina JA, Diab HI, Lishu L, et al. The nutrient-responsive transcription factor TFE3 promotes autophagy, lysosomal biogenesis, and clearance of cellular debris. *Sci Signal.* 2014 Jan 21;7(309):ra9. PubMed PMID: 24448649.
3. Wang Y, Huang Y, Liu J, et al. Acetyltransferase GCN5 regulates autophagy and lysosome biogenesis by targeting TFEB. *EMBO Rep.* 2020 Jan 7;21(1):e48335. PubMed PMID: 31750630.
